# Supplementary material for: Osteoarthritis-Induced Metabolic Alterations of Human Hip Chondrocytes
Source: MDPI journal article supplement (doi:10.3390/biomedicines10061349), 2022-06-08
Supplement: s1 [file s1]

## Supplementary materials

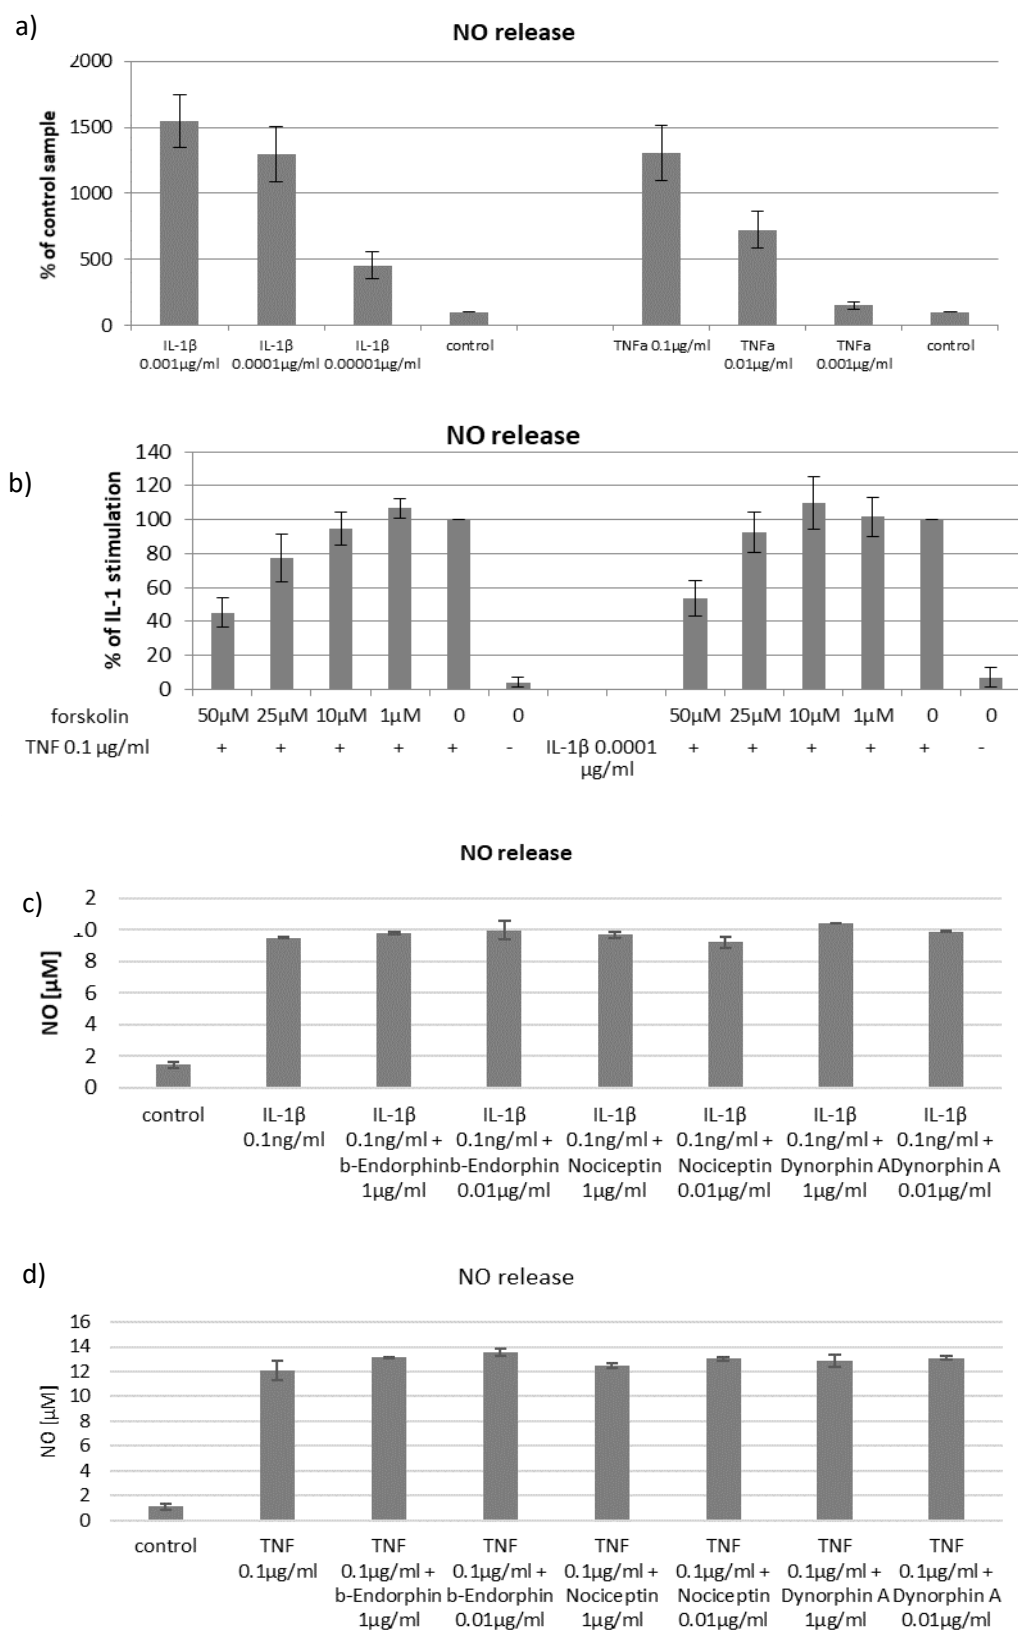

Suppl. Figure S1. Preliminary experiments to evaluated concentrations of a) IL-1β and TNF, b) forskolin, c) and d) opioid neuropeptides for stimulation experiments on human OA chondrocytes. Following concentrations were selected: 0.1 ng/mL IL-1β, 0.1 μg/mL TNF, 50 μM forskolin and 0.1 μg/mL β-endorphin, nociception and dynorphin A.
